# Supplementary material for: About the mechanism of ultrasonically induced protein capsule formation
Source: Royal Society of Chemistry journal article supplement (doi:10.1039/d0ra08100k), 2021-01-01
Supplement: d0ra08100k1.pdf [file d0ra08100k1.pdf]

## Supporting Information

### About the mechanism of ultrasonically induced protein capsule formation

Ulrike Doering,<sup>a</sup> Dmitry Grigoriev,<sup>\*b</sup> Kosti Tapio,<sup>a</sup> Sophia Rosencrantz,<sup>b</sup> Ruben R. Rosencrantz,<sup>b</sup> Ilko Bald<sup>a</sup> and Alexander Böker<sup>a,b</sup>

a. Chair of Polymer Materials and Polymer Technologies, University of Potsdam, Institute of Chemistry, Karl-Liebknecht-Str. 24-25, 14476 Potsdam, Germany

b. Fraunhofer Institute for Applied Polymer Research IAP, Geiselbergstr. 69, 14476 Potsdam, Germany

Email: Dmitry Grigoriev\* – dmitry.grigoriev@iap.fraunhofer.de

\* Corresponding Author

#### Experimental Section

**Materials:** Bovine serum albumin (BSA, > 95%) was purchased from Alfa Aesar (Germany). Toluene ( $\geq 99,5\%$ ) was purchased from Th. Geyer (Germany). Dithiothreitol (DTT,  $\geq 99\%$ ) was purchased from Carl Roth (Germany). All chemicals were used without further purification.

**Preparation of protein microcapsules:** The microcapsules were prepared by following Suslick's method.<sup>1</sup> In a cylindrical vessel, 1.4 mL toluene was layered over 2.1 mL of a 5% w/v BSA solution. The used ratio of aqueous/organic phase was 3:2. A high-intensity ultrasonic horn with a tip diameter of 2 mm was placed at the oil-water interface. To maintain the temperature below 30°C during ultrasonication, the vessel was positioned in an ice bath. The solutions were sonicated for 3 minutes at an acoustic power of  $\sim 200 \text{ W cm}^{-2}$ . Simultaneously, the solutions were mixed with a magnetic stirrer. The obtained microcapsules were dialyzed against distilled water with pH of  $6.2 \pm 0.3$  using a dialysis tube with a cutoff of 1000 kDa (Spectrum Labs Spectra/Por Dialysis Membrane Biotech CE) to remove residual chemicals and fragments of broken microcapsules.

**Mixing experiments by the use of a Vortex mixer:** In a cylindrical vessel, 1.4 mL toluene was layered over 2.1 mL of a 5% w/v BSA solution. The used ratio of aqueous/organic phase was 3:2. The solutions were shaken by a Vortex mixer for 3 minutes at moderate intensity.

**Fluorescence Microscopy:** Fluorescence Microscopy images were taken by a Leica DMI8 microscope and the resulted images were processed via Leica Application Suite X software provided by Leica.

**Cryo Scanning Electron Microscopy:** Characterization with cryo scanning electron microscopy was done on a S-4800 (Hitachi) with an acceleration voltage of 2 keV.

**Sodium dodecylsulfate polyacrylamide gel electrophoresis:** Intermolecular disulfide bonds should form covalent oligomers that can be verified by their size and should be cleaved by reducing agents. Thus, the samples were analyzed by reducing and non-reducing sodium dodecylsulfate polyacrylamide gel electrophoresis (SDS-PAGE). The sample of empty capsules as well as one of pristine BSA as control were mixed with non-reducing buffer (ROTIload 2, Carl Roth) with or without addition of DTT (100 mM) and separated using a gradient gel (4 - 15 %, Bio-Rad) at constant current of 25 mA. Each lane of SDS-PAGE assay was loaded with the same amount (13.5  $\mu\text{g}$ ) of abovementioned samples. Afterwards, the gel was stained with Coomassie Brilliant Blue R-250 (Applichem). A protein ladder (ROTIMark TRICOLOR XTRA, Roth) was used to determine the size of the samples.

*Cleavage of the disulfide bonds with DTT for Raman spectroscopy:* The protein microcapsules were prepared as described before. A 1 M DTT solution was added and the mixture was stirred for 10 minutes. Subsequently, the solution was dialyzed again against distilled water. BSA was treated the same way.

*Raman spectroscopy:* All Raman data was acquired using a Witec Alpha 300 Raman microscope system (Witec, Ulm, Germany) equipped with a spectrograph (600 gr/mm grating) and an Andor DU401A-BR-DD-352 CCD camera (Andor, Concord, Massachusetts, USA). An Olympus MPlanFL-N 100x objective (N.A. = 0.9, Shinjuku-ku, Tokyo, Japan) and 488 nm and 532 nm excitation lasers were utilized during the measurements. Before measurements, the power density was adjusted to  $3.7 \times 10^4$  W/cm<sup>2</sup> for the 488 nm laser (the estimated spot size is 1.32  $\mu$ m). The dried samples were placed on empty microscope slides and slightly pressed and flattened using a spatula. Slides were put under the microscope and the signal was acquired by measuring single point spectra: The sample of dried BSA-toluene-capsules cleaved with DTT was measured using 10 s integration time and averaging over 100 spectra, the dried BSA sample with 12 s and 20 spectra averaging and the dried, non-cleaved BSA-toluene-capsule sample with 8 s and 30 spectra averaging. The toluene spectrum was also recorded using 1 s integration time and averaging 40 spectra and it was used as an internal standard to check the instrument calibration over the measurement range.

*Dynamic light scattering:* The intensity weighted mean diameters (Z-average) of pristine monomeric BSA, empty BSA capsules and BSA chemically cross-linked with glutaraldehyde (GA) were measured by a Zetasizer Nano ZS (Malvern Panalytical). The samples were diluted and filtered with a 0.2  $\mu$ m PVDF membrane. BSA was chemically cross-linked by shaking a mixture of 1 mg/ml BSA and 0.5% glutaraldehyde overnight.

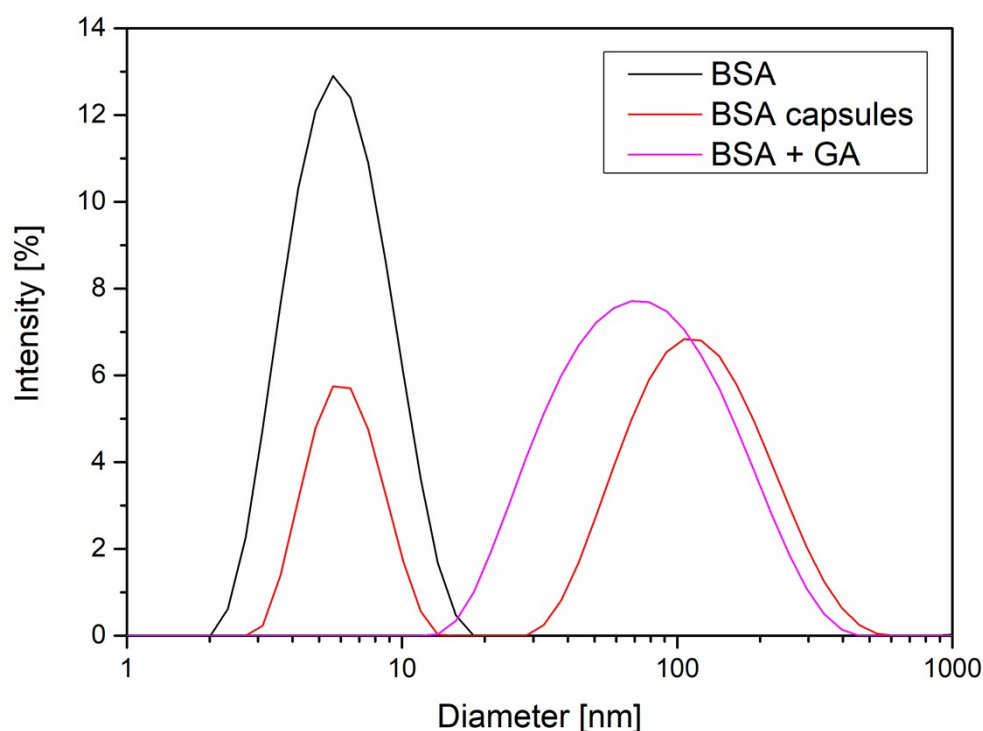

**Figure S1.** Results of DLS measurements for pristine monomeric BSA, empty BSA capsules and BSA chemically cross-linked with glutaraldehyde (GA).

## References

- 1 K. J. Liu, M. W. Grinstaff, J. Jiang, K. S. Suslick, H. M. Swartz and W. Wang, *Biophys. J.*, 1994, **67**, 896.
